# Supplementary material for: Singlet oxygen is not the main source of electrolyte degradation in lithium–oxygen batteries
Source: Royal Society of Chemistry journal article supplement (doi:10.1039/d4ee02176b), 2024-01-01
Supplement: d4ee02176b1.pdf [file d4ee02176b1.pdf]

# Singlet oxygen is not the main source of electrolyte degradation in lithium-oxygen batteries

## Supplementary Information

Ceren Zor<sup>1</sup>, Kieran D. Jones<sup>2,3</sup>, Gregory J. Rees<sup>1,2</sup>, Sixie Yang<sup>1</sup>, Alexander Pateman<sup>1</sup>, Xiangwen Gao<sup>1</sup>, Lee R. Johnson<sup>2,3,4\*</sup>, and Peter G. Bruce<sup>1,2,4\*</sup>

<sup>1</sup>Department of Materials, University of Oxford, Oxford, U.K.

<sup>2</sup>The Faraday Institution, Quad One, Harwell Science and Innovation Campus, Didcot, OX11 0RA, UK

<sup>3</sup>Nottingham Applied Materials and Interfaces Group, School of Chemistry, University of Nottingham, Nottingham, U.K.

<sup>4</sup>Department of Chemistry, University of Oxford, Oxford, U.K.

[\\*peter.bruce@materials.ox.ac.uk](mailto:peter.bruce@materials.ox.ac.uk), [lee.johnson@nottingham.ac.uk](mailto:lee.johnson@nottingham.ac.uk)

## Contents

|                                                                                              |    |
|----------------------------------------------------------------------------------------------|----|
| General information .....                                                                    | 2  |
| Experimental.....                                                                            | 3  |
| On-line Mass-Spectrometry Analysis .....                                                     | 3  |
| Carbonate analysis - Acid treatment .....                                                    | 3  |
| Carboxylate analysis – Fenton’s reagent treatment .....                                      | 3  |
| Singlet Oxygen ( <sup>1</sup> O <sub>2</sub> ) Generation for On-line MS Experiments .....   | 3  |
| <sup>1</sup> O <sub>2</sub> oxidation of DMSO .....                                          | 4  |
| Determination of <sup>1</sup> O <sub>2</sub> formation rate and comparison to the cell ..... | 5  |
| Electrode Preparation .....                                                                  | 5  |
| Electrochemical Experiments .....                                                            | 6  |
| Singlet Oxygen Induced Degradation Studies (Batch) .....                                     | 7  |
| Photochemical Set-up .....                                                                   | 7  |
| Tetraglyme & LiTFSI Experiments.....                                                         | 7  |
| Supplementary Note 1: Tetraglyme degradation calculations .....                              | 9  |
| Spectra .....                                                                                | 10 |
| References .....                                                                             | 14 |

## General information

**Reagents and solvents.** Tetraethylene glycol dimethyl ether (tetraglyme,  $\geq 99\%$ ) and dimethyl sulfoxide (DMSO) were purchased from Sigma-Aldrich and dried over 4 Å molecular sieves for at least three days before use ( $\text{H}_2\text{O} < 10$  ppm determined by Karl Fischer titration). Lithium bis(trifluoromethanesulfonyl)imide (LiTFSI, 99.99%, Sigma-Aldrich) was dried at 85 °C under vacuum overnight ( $> 12$  h). 9,10-Dimethylantracene (DMA, Sigma-Aldrich, 99%) was purified by recrystallisation in ethanol, melted under constant argon flow followed by recrystallisation in ethanol. The purified powder was dried at 85 °C under vacuum overnight ( $> 12$  h). 5,10,15,20-Tetraphenyl-21*H*,23*H*-porphine (TPP), 4,5,6,7-tetrachloro-2',4',5',7'-tetraiodofluorescein disodium salt (rose bengal, RB) and 1,4-dicyanobenzene were purchased (Sigma-Aldrich) and used without further purification.

**Nuclear magnetic resonance (NMR) spectroscopy details.** The  $^1\text{H}$  NMR spectroscopy details for samples presented in **Figure S2** are as follows: Deuterated benzene ( $\text{C}_6\text{D}_6$ ) was used as the lock solvent in a 1:9 solvent: sample ratio. NMR experiments were performed on a Bruker AVIII 400 ( $\nu_0$  ( $^1\text{H}$ ) = 400.17 MHz) spectrometer equipped with 5 mm z-gradient broadband multinuclear probe. The  $T_1$  was calculated using an inversion recovery sequence, and a 10-second recycle delay ( $> 5T_1$ ) was used throughout.

Samples for quantitative NMR studies (**Figure S3**) were prepared using  $\text{CD}_3\text{CN}$  as the lock solvent with a 9:1 solvent: sample ratio. The 1D and 2D NMR experiments were performed on a Bruker AVIII 600 ( $\nu_0$  ( $^1\text{H}$ ) = 600.13 MHz, with a proton-optimised TCI HCN cryoprobe spectrometer). The  $T_1$  was determined using an inversion recovery sequence, and a 30-second recycle delay ( $> 5T_1$ ) was used throughout.

$^1\text{H}$  and  $^{19}\text{F}$  NMR spectra for **Figures 3, S5 - S8** were acquired on a Bruker AV(III)400 HD or a Bruker AV(III)500 HD fitted with a 5 mm BBFO and 5 mm prodigy BBO probes, respectively. Deuterated chloroform ( $\text{CDCl}_3$ ) was used as the lock solvent.

The chemical shifts in  $^1\text{H}$  spectra were referenced to the residual (partially) non-deuterated solvent according to Fulmer et al.<sup>1</sup>  $^{19}\text{F}$  NMR spectra were referenced through the solvent lock ( $^2\text{H}$ ) signal according to the IUPAC-recommended secondary referencing method following Bruker protocols.<sup>2</sup> Processing of all NMR data was conducted with Bruker TopSpin or Mestrelab Research Mnova software suites.

## Experimental

---

### On-line Mass-Spectrometry Analysis

On-line MS (ThermoFisher Prima BT process mass spectrometer) was used to monitor the reactivity of  $^1\text{O}_2$  with the selected solvents and to quantify the  $\text{CO}_2$  evolved during the analysis of carbonate and carboxylate formed due to degradation. For monitoring the reactivity of  $^1\text{O}_2$ , the gas outlet of the  $^3\text{O}_2$  purged samples was connected to an on-line MS, and once a stable  $^3\text{O}_2$  baseline was achieved, samples were irradiated to begin  $^1\text{O}_2$  production. When irreversible reactions occur with  $^1\text{O}_2$ , the measured  $^3\text{O}_2$  concentration decreases as  $\text{O}_2$  has been removed from flow. It is assumed all  $^1\text{O}_2$  returns to the ground state before reaching the MS due to its short half-life (10-100  $\mu\text{s}$ ).<sup>3,4</sup>

To study the amount of carbonate and carboxylate groups generated on WEs, acid and Fenton's reagent treatments were used as previously described.<sup>5</sup> For  $^{13}\text{C}$  samples, the electrodes were rinsed with DME and dried under vacuum. Samples were connected to the on-line MS and Ar was used as the carrier gas. Once  $m/z$  44 ( $\text{CO}_2$ ) and  $m/z$  45 ( $^{13}\text{CO}_2$ ) signals stabilised, phosphoric acid was added and after the baseline stabilised for the second time, Fenton's reagent was added to decompose all the carbonate and carboxylate species, accordingly.

### Carbonate analysis - Acid treatment

2 M  $\text{H}_3\text{PO}_4$  is added to the electrodes to decompose all present inorganic carbonates to  $\text{CO}_2$  *i.e.*  $\text{Li}_2\text{CO}_3$  to  $\text{CO}_2$ .<sup>5</sup>

### Carboxylate analysis – Fenton's reagent treatment

Fenton's reagent<sup>6</sup> was used to decompose carboxylates into  $\text{CO}_2$ . The reaction for Fenton's reagent generates radicals such as  $\text{OH}^\cdot$  and  $\text{HO}_2^\cdot$  which can attack electron deficient carbonyl sites such as in acetate and formate, releasing  $\text{CO}_2$ . 0.5 M  $\text{FeSO}_4$  in 2 M  $\text{H}_3\text{PO}_3$  and  $\text{H}_2\text{O}_2$  (30%) was added to the electrodes after all  $\text{CO}_2$  evolution from carbonate analysis had ceased.

### Singlet Oxygen ( $^1\text{O}_2$ ) Generation for On-line MS Experiments

Photocatalytic generation of  $^1\text{O}_2$  was achieved using RB or TPP (<10  $\mu\text{M}$ ) with 530 nm or 660 nm light sources, respectively. The solutions were saturated with dry  $^3\text{O}_2$  by continued sparging throughout the experiments. The experiments were either conducted in an Ar-filled glovebox or a cell connected to an on-line mass spectrometer. For experiments connected to the on-line mass-spectrometer, 20%  $\text{O}_2$ :80% Ar gas (dried over activated molecular sieves in the gas line) was bubbled into the samples whilst constantly stirring. 100%  $\text{O}_2$  (N5.0 grade) was used for the experiments carried out in a glovebox. The chemical stability of the photosensitiser with the electrolyte and its electrochemical stability at 3.8 V are important selection criteria. Hence, RB was only used for chemical experiments, while TPP which is stable at higher oxidising potentials (**Figure S1**) was used in the electrochemical experiments.

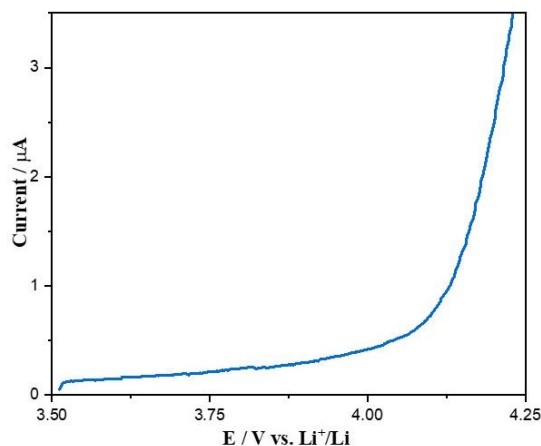

**Figure S1.** Cyclic voltammogram of 7  $\mu\text{M}$  TPP in 0.1 M LiTFSI and tetraglyme. The CV was recorded with a planar Au working and counter electrodes and a fritted delithiated LiFePO<sub>4</sub> reference electrode at a scan rate of 100  $\text{mV s}^{-1}$ .

### <sup>1</sup>O<sub>2</sub> oxidation of DMSO

DMSO was treated with <sup>1</sup>O<sub>2</sub> and O<sub>2</sub> consumption was monitored via online-mass spectrometry using the procedures described above (**Scheme S1**). Dimethyl sulfone (DMSO<sub>2</sub>) was determined to be the major product, and the spectroscopic data (**Figure S2**) is consistent with those reported previously.<sup>7</sup>

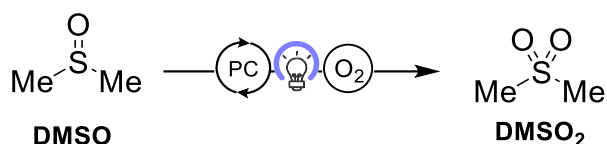

**Scheme S1.** Photo-oxidation of DMSO via singlet oxygen.

FTIR spectra of the resulting mixture were recorded in an N<sub>2</sub>-filled glovebox using a Thermo Fischer Nicolet iS50 FTIR Spectrometer. The spectra showed new peaks consistent with DMSO<sub>2</sub> (**Figure S2**). FTIR ( $\text{cm}^{-1}$ ) 1142 ( $\nu_{\text{as}}\text{SO}_2$ ), 763 ( $\nu_{\text{s}}\text{CSC}$ ), 499 ( $\delta_{\text{OSO}}$ ), 465 ( $\gamma$  or  $\rho\text{SO}_2$ ).

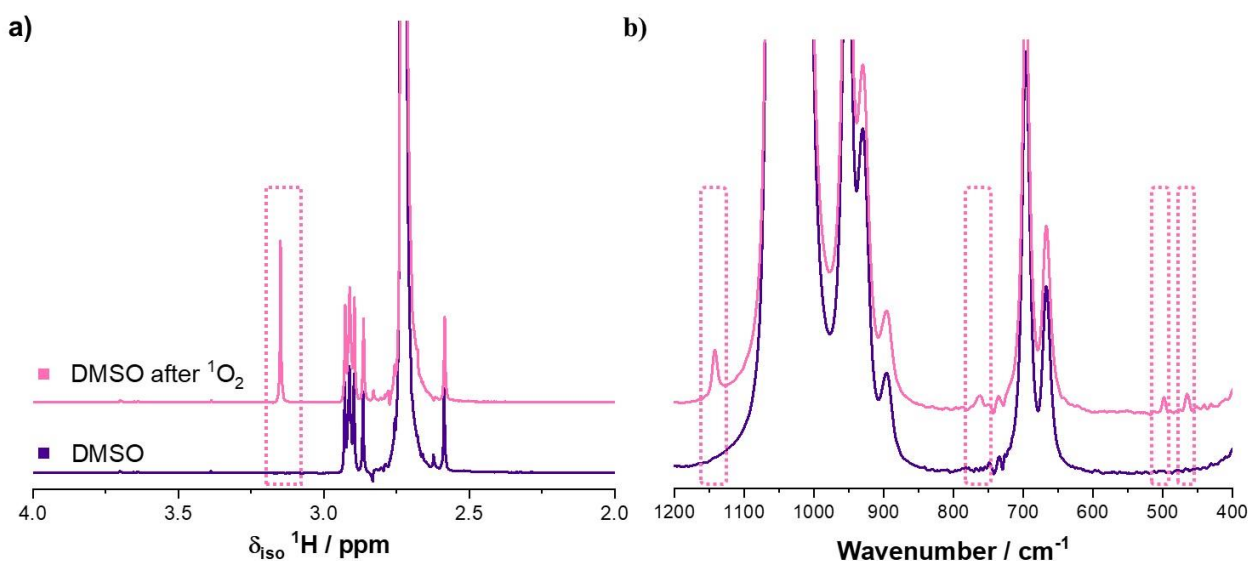

**Figure S2.** a) <sup>1</sup>H NMR (400 MHz, C<sub>6</sub>D<sub>6</sub>, 298.1 K) spectra of the DMSO reaction solution before and after exposure to <sup>1</sup>O<sub>2</sub>. b) FTIR spectra for DMSO (purple) and <sup>1</sup>O<sub>2</sub> treated DMSO (pink, DMSO<sub>2</sub> peaks highlighted).

### Determination of $^1\text{O}_2$ formation rate and comparison to the cell

The amount of  $^1\text{O}_2$  generation was confirmed by NMR spectroscopic experiments. DMA (75 mM) and TPP (7  $\mu\text{M}$ ) were dissolved in 0.1 M LiTFSI tetraglyme electrolyte and 100% dry  $\text{O}_2$  was bubbled into the solution. The light was turned on after 2 h to ensure that the solution was initially saturated with  $^3\text{O}_2$  before  $^1\text{O}_2$  generation. The duration of light exposure was recorded, and samples were analysed by quantitative NMR to quantify DMA and 9,10-dimethyl-9,10-dihydro-9,10-epidioxyanthracene (DMAO<sub>2</sub>) (**Figure S3**). The amount of DMAO<sub>2</sub> was calculated by integration of the NMR data, and the rate of  $^1\text{O}_2$  generation under these photochemical conditions was estimated to be  $1.56 \times 10^{-5} \text{ mol min}^{-1}$  assuming 100% capture of  $^1\text{O}_2$  by DMA. The efficiency of the  $^1\text{O}_2$  generation was tested under an applied potential of 3.8 V and the amount of DMAO<sub>2</sub> is not affected by the voltage. Correcting for volume, 750  $\mu\text{L}$  of electrolyte gives a rate per volume of  $2.08 \times 10^{-2} \text{ mol } ^1\text{O}_2 \text{ L}^{-1}\text{min}^{-1}$ . The rate of  $^1\text{O}_2$  formation in a cell containing 100  $\mu\text{L}$  electrolyte and 1 mg carbon electrode discharging at 100 mA  $\text{g}^{-1}_{\text{carbon}}$ , and assuming 2%  $^1\text{O}_2$  generation, is  $6.12 \times 10^{-6} \text{ mol } ^1\text{O}_2 \text{ L}^{-1}\text{min}^{-1}$  which is  $\sim 1000$  times less than that found in the online-MS experiments. Assuming the steady-state concentration of  $^1\text{O}_2$  is directly proportional to the rate of formation, then the  $^1\text{O}_2$  concentration is also  $\sim 1000$  greater in our degradation analysis compared to the cell and can be considered a harsher test of stability.

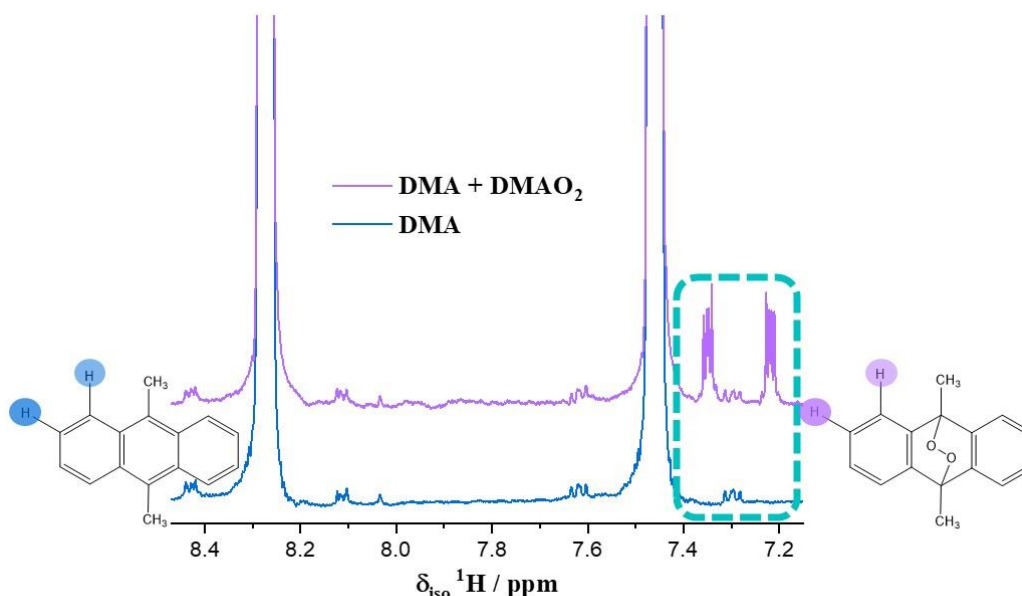

**Figure S3.** The  $^1\text{H}$  NMR (600 MHz,  $\text{CD}_3\text{CN}$ , 298.1 K) spectra of a solution containing 75 mM DMA (*bottom*) and a  $^1\text{O}_2$  exposed solution (*top*) show resonances for DMA and DMAO<sub>2</sub>. The aromatic peaks for DMAO<sub>2</sub> are marked in the dashed box.

### Electrode Preparation

For  $^{13}\text{C}$ -PTFE composite working electrodes (WEs), amorphous carbon-13 powder ( $^{13}\text{C}$ , Sigma-Aldrich) was treated at 900  $^\circ\text{C}$  under  $\text{Ar}:\text{H}_2$  (95:5, v/v) flow for 5 h. The carbon powder was transferred to an Ar-filled glovebox. The WEs were prepared in an Ar-filled glovebox by mixing  $^{13}\text{C}$  and PTFE powder in an agate mortar. 10 mg of the composite material was pressed into a 7 mm diameter. The pellet was then pressed onto a stainless-steel mesh (100 mesh, Advent-RM) current collector.

$\text{Li}_2\text{O}_2$ -preloaded working electrodes ( $^{13}\text{C}$ - $\text{Li}_2\text{O}_2$  WEs) were prepared by grinding carbon-13 powder and in-house synthesised  $\text{Li}_2\text{O}_2$  (80:20 w/w), and adding 15% PTFE powder to this mixture. Similar to  $^{13}\text{C}$  WE,  $^{13}\text{C}$ - $\text{Li}_2\text{O}_2$  composite material was pressed into 7 mm diameter pellets with 10 mg material loading.

LiFePO<sub>4</sub> was used as the counter and reference electrode material. To make LiFePO<sub>4</sub> electrodes, LiFePO<sub>4</sub>, Super P, and PTFE (in water) were mixed in an 80:10:10 w/w ratio with isopropanol into a homogenous paste. This paste was cast on stainless steel mesh. The LiFePO<sub>4</sub> electrodes were chemically delithiated to ~20 % total capacity (Li<sub>x</sub>FePO<sub>4</sub>, x<1). For this, the electrodes were soaked in 1.5 mL acetic acid (Aldrich), 3.6 ml 30% H<sub>2</sub>O<sub>2</sub> (Aldrich) and 250 ml MilliQ water for 20 minutes.<sup>9</sup> The electrodes were washed with MilliQ water (18.2 MΩ cm) and isopropanol until all the acetic acid was removed, dried under vacuum at 85 °C overnight, and transferred into an Ar-filled glovebox.

### **Electrochemical Experiments**

The effect of <sup>1</sup>O<sub>2</sub> under applied potential was investigated by applying a constant potential of 3.8 V Li|Li<sup>+</sup> for 12 hours whilst photochemically generating <sup>1</sup>O<sub>2</sub> in-situ. The same electrochemical experiments were repeated with <sup>3</sup>O<sub>2</sub> (without turning on the light source). The electrodes were carbon-13 (WE), LiFePO<sub>4</sub> (CE), and delithiated LiFePO<sub>4</sub> (REF). The electrolyte was 0.1 M in LiTFSI in tetraglyme containing 7 μM TPP.

<sup>13</sup>C-Li<sub>2</sub>O<sub>2</sub> WEs were used to investigate the effect of Li<sub>2</sub>O<sub>2</sub> on degradation and for these experiments the cell was charged under Ar atmosphere at a constant potential of 3.8 V.

Cyclic voltammetry was performed in a heart-shaped flask with a planar Au working and counter electrodes and a fritted delithiated LiFePO<sub>4</sub> reference electrode at a scan rate of 100 mV s<sup>-1</sup>.

## Singlet Oxygen Induced Degradation Studies (Batch)

### Photochemical Set-up

Photochemical reactions were conducted using green LED bulbs (5 W). Lamps were positioned with a bulb-to-vial distance of approximately 10-15 mm and fan cooling was used to maintain an external temperature of ~25-30 °C (**Figure S4**). Internal temperatures were measured to not exceed 27 °C. All reactions were magnetically stirred at 500 rpm using a PTFE coated stirrer bar.

**Warning: Oxygenated ethers.** Extended storage of oxygenated ether solvents, particularly in the absence of a stabiliser, is hazardous due to the accumulation of organic peroxides which can lead to unexpected explosions.<sup>10</sup> Ensure temperatures do not exceed 30 °C due to the risk of detonation.

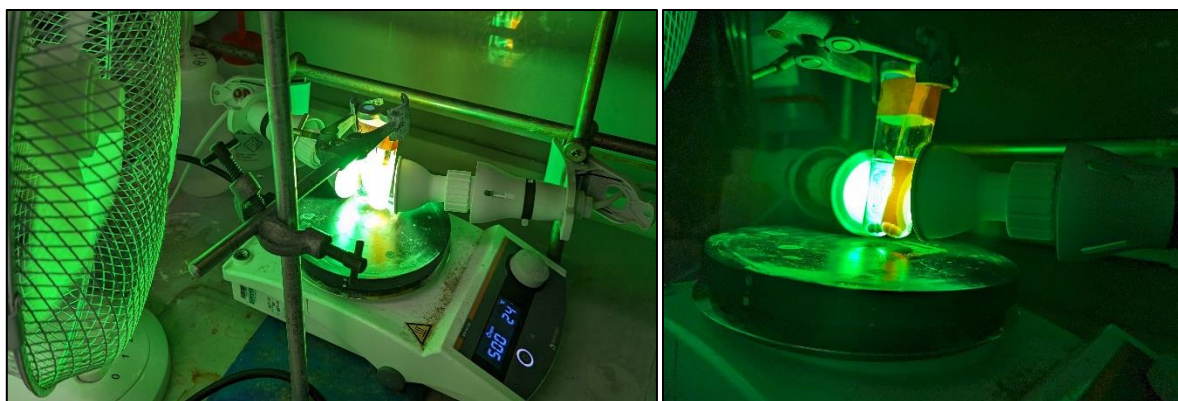

**Figure S4.** Photochemical set-up for reactions using green LED bulbs (5 W).

### Tetraglyme & LiTFSI Experiments

Photosensitisation of triplet oxygen with RB or TPP has been reported as an efficient method for  $^1\text{O}_2$  formation and subsequent  $^1\text{O}_2$  mediated C-H hydroperoxidation of cyclic ethers (such as THF) and activated linear ethers.<sup>11</sup> Having successfully reproduced these results with THF (not shown), the method was deemed suitable for the evaluation of tetraglyme and 1 M LiTFSI in tetraglyme stability to  $^1\text{O}_2$  by both flow and batch. A modified general procedure deviating from Su, M and co-authors' method is described below. Results for tetraglyme and 1 M LiTFSI in tetraglyme are summarised in **Tables S1** and **S2**, respectively. In both cases, no change to tetraglyme or the TFSI anion following prolonged exposure to  $^3\text{O}_2$  with and without photocatalyst, nor when irradiated with green light in the absence of photocatalyst was detected by  $^1\text{H}$  and  $^{19}\text{F}$  NMR spectroscopies (**Figure S5-7**). Under reaction conditions producing  $^1\text{O}_2$  (**Entry 4, Tables S1 & S2**) new resonances were observed in the  $^1\text{H}$  NMR spectra at 11.0 – 8.5 ppm and 5.5 – 4.5 ppm suggesting tetraglyme degradation (**Figure S5 & S6, Scheme S2**). Conversely, the TFSI anion showed no change by  $^{19}\text{F}$  NMR spectroscopy following prolonged exposure to  $^1\text{O}_2$  (**Figure S7**), even with organic hydroperoxide species present, suggesting stability to both  $^1\text{O}_2$  and tetraglyme degradation products.

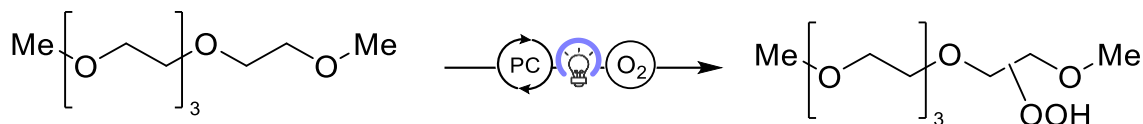

**Scheme S2.** Photo-oxidation of tetraglyme via singlet oxygen.

**General procedure:** An oven-dried microwave vial equipped with a stirrer bar was taken inside a glovebox (nitrogen atmosphere) before the addition of tetraglyme solution (with or without 1 M LiTFSI) and rose bengal stock solution (if using) to a total volume of 4 mL. The vial was sealed with a septum-lined cap, removed from the glovebox and sparged with oxygen (5-10 min) before irradiating according to the described photochemical setup for 18 h. An internal standard, 1,4-dicyanobenzene (5.1 mg, 0.04 mmol, 0.01 M), was added to the resulting solution, a 50  $\mu$ L aliquot was taken, added to  $\text{CDCl}_3$  (0.75 mL) and NMR spectroscopies measured.

**Table S1.** Stability test of tetraglyme under the photocatalytic generation of singlet oxygen.<sup>a</sup>

| Entry | Photocatalyst | Light source | Degradation detected |
|-------|---------------|--------------|----------------------|
| 1     | None          | None         | NPD                  |
| 2     | None          | Green        | NPD                  |
| 3     | <b>RB</b>     | None         | NPD                  |
| 4     | <b>RB</b>     | Green        | Traces               |

<sup>a</sup>Reaction conducted according to the *general procedure*: Photocatalyst ( $1 \times 10^{-5}$  M), tetraglyme (4 mL),  $\text{O}_2$ , irradiated for 18 h. NPD = No products detected. Trace is denoted when the concentration of products is  $<1$  mM.

**Table S2.** Stability test of 1 M LiTFSI tetraglyme solution under the photocatalytic generation of singlet oxygen.<sup>a</sup>

| Entry | Photocatalyst | Light source | Degradation detected |        |
|-------|---------------|--------------|----------------------|--------|
|       |               |              | Tetraglyme           | LiTFSI |
| 1     | None          | None         | NPD                  | NPD    |
| 2     | None          | Green        | NPD                  | NPD    |
| 3     | <b>RB</b>     | None         | NPD                  | NPD    |
| 4     | <b>RB</b>     | Green        | Trace                | NPD    |

<sup>a</sup>Reaction conducted according to the *general procedure*: Photocatalyst ( $1 \times 10^{-5}$  M), 1 M LiTFSI tetraglyme (4 mL),  $\text{O}_2$ , irradiated for 18 h. NPD = No products detected. Trace is denoted when the concentration of products is  $<1$  mM.



### Supplementary Note 1: Tetraglyme degradation calculations

As indicated by  $^1\text{H}$  NMR spectroscopy, tetraglyme underwent degradation in the presence  $^1\text{O}_2$  with observable signals in the regions of 11.0 – 8.5 ppm and 5.5 – 4.5 ppm (**Figure 3 & S5, S6 & S8**). These resonances are in the expected regions for organic hydroperoxide proton (OOH) and associated tertiary proton (OCH) environments, respectively. Given tetraglyme contains multiple sites vulnerable to oxidation (eight  $\alpha\text{-CH}_2$  positions), a series of mono, bis, or greater hydroperoxide species are the likely contributors to the observed signals. Under the assumption that each new resonance in the region of 11.0 – 8.5 ppm corresponds to a reacted  $^1\text{O}_2$ , we note seven significant peaks with the concentration for each of these new species to be approximately 0.2 – 0.8 mM as determined by  $^1\text{H}$  NMR spectroscopic analysis. Thus, the estimated maximum concentration of accumulated  $^1\text{O}_2$  products is ca. 5.6 mM, with moles of  $^1\text{O}_2$  consumed approximated to be  $2.2 \times 10^{-5}$  mol.

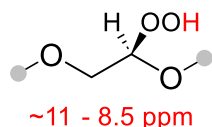

- Seven significant signals in region, each 0.2 - 0.8 mM
- Assume each signal corresponds to a reacted  $^1\text{O}_2$

#### **Scheme S3.** Photo-oxidation sites at tetraglyme by singlet oxygen and highlighting the new $^1\text{H}$ NMR resonance region of 11.0 – 8.5 ppm

To understand the impact of tetraglyme degradation by  $^1\text{O}_2$  on the cell, we can compare the amount of degradation products formed per  $^1\text{O}_2$  in model experiments and relate this to known  $^1\text{O}_2$  formation in the cell. The NMR spectroscopic analysis above suggests that the rate of  $^1\text{O}_2$  formation is ca.  $2.08 \times 10^{-2}$  mol  $^1\text{O}_2$   $\text{L}^{-1}\text{min}^{-1}$  for photochemical reactions, considering the variance between our  $^1\text{O}_2$  quantification and degradation (Batch) studies, this value is expected to be a minimum rate and thus an overestimate of the impact of  $^1\text{O}_2$ . Assuming the photocatalyst was active for only 4 hours before bleaching, the total amount of  $^1\text{O}_2$  formed is ca. 5.0 moles  $^1\text{O}_2$   $\text{L}^{-1}$ . Taking the concentration of degradation products above and normalising this to the total  $^1\text{O}_2$  formed per unit volume, the moles of degradation products per mole of  $^1\text{O}_2$  is  $1.1 \times 10^{-3}$  mol mol $^{-1}$ . Assuming 2 % of all moles of oxygen form  $^1\text{O}_2$  in the cell during charge, then the percentage of degradation due to singlet oxygen in the cell is ca.  $2.2 \times 10^{-3}\%$ . Assuming a worst-case scenario where 10 % of oxygen used within the cell forms  $^1\text{O}_2$ , then the estimated amount of degradation is still only 0.01 % of the discharge product which is not consistent with the 10 % found in practical cells. In summary,  $^1\text{O}_2$  degradation pathways of the solvent and salt are likely minor compared to other challenges existing in state-of-the-art systems.

## Spectra

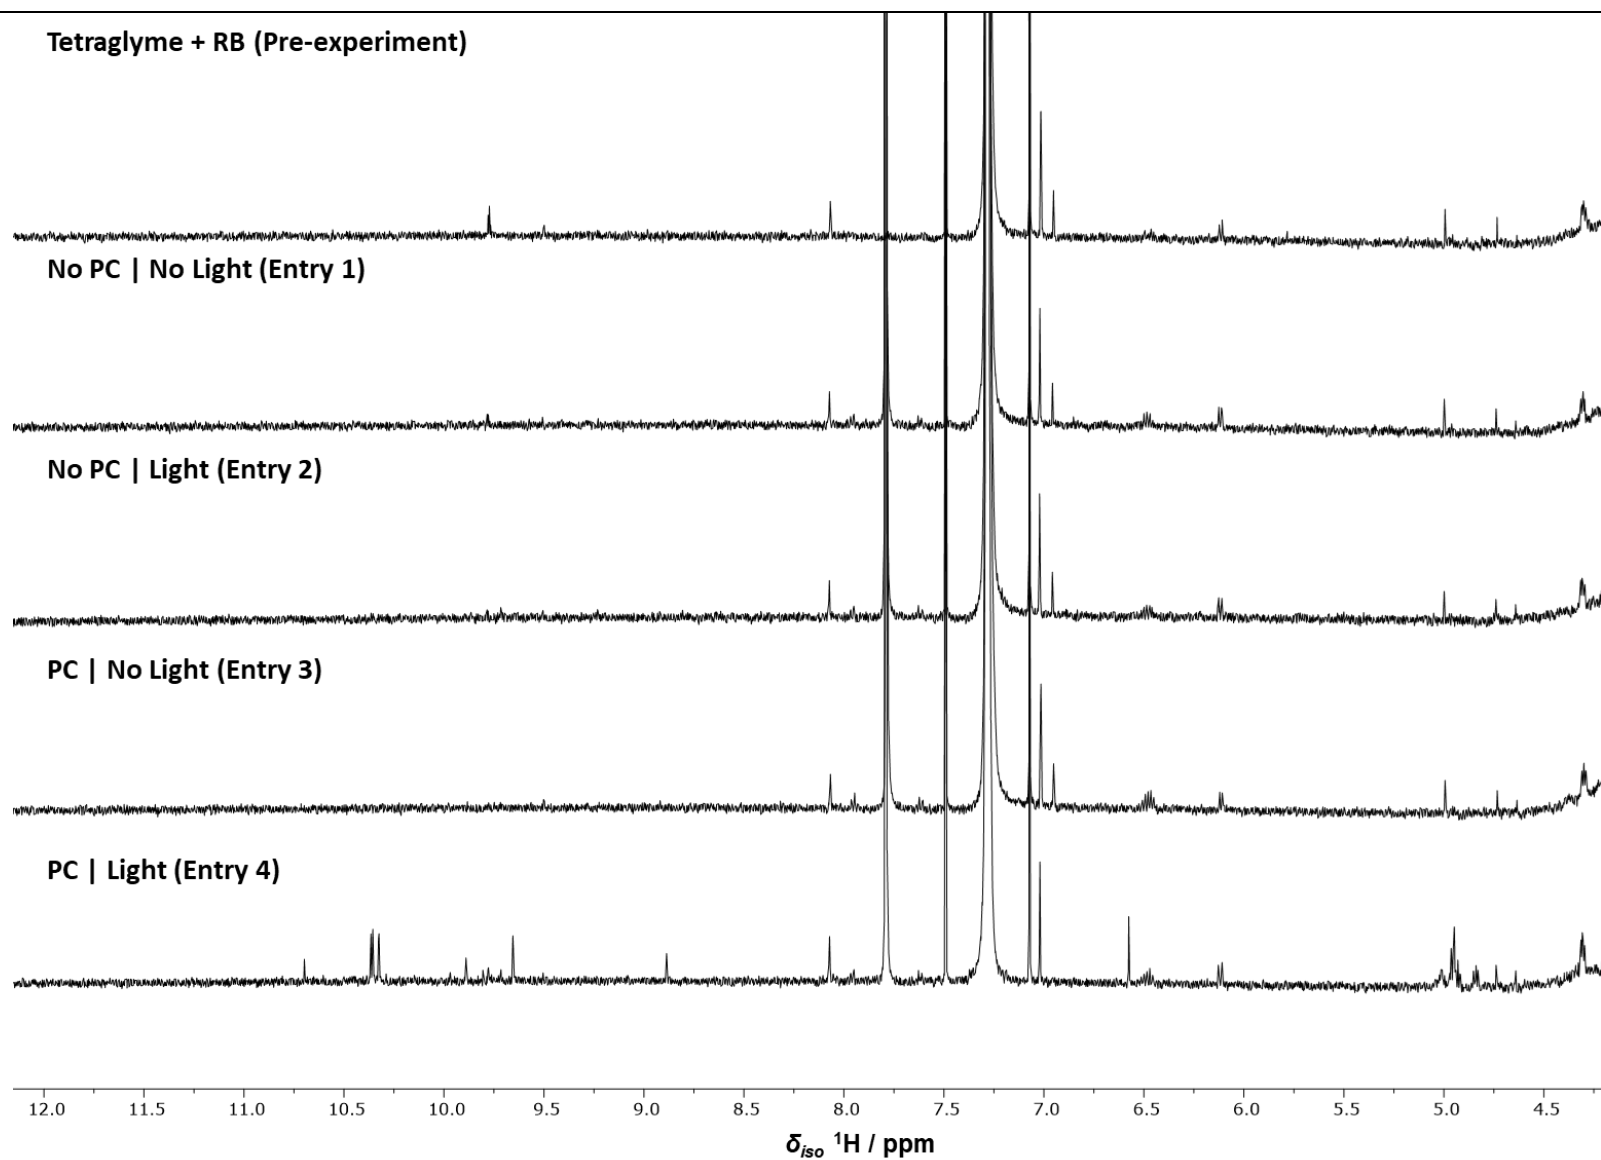

**Figure S5.** Highlighted baseline of  $^1\text{H}$  NMR (500 MHz,  $\text{CDCl}_3$ , 298 K) spectra of tetraglyme experiments from **Table S1**, notable degradation products detected only under singlet oxygen forming reaction conditions (*entry 4*). PC = photocatalyst.

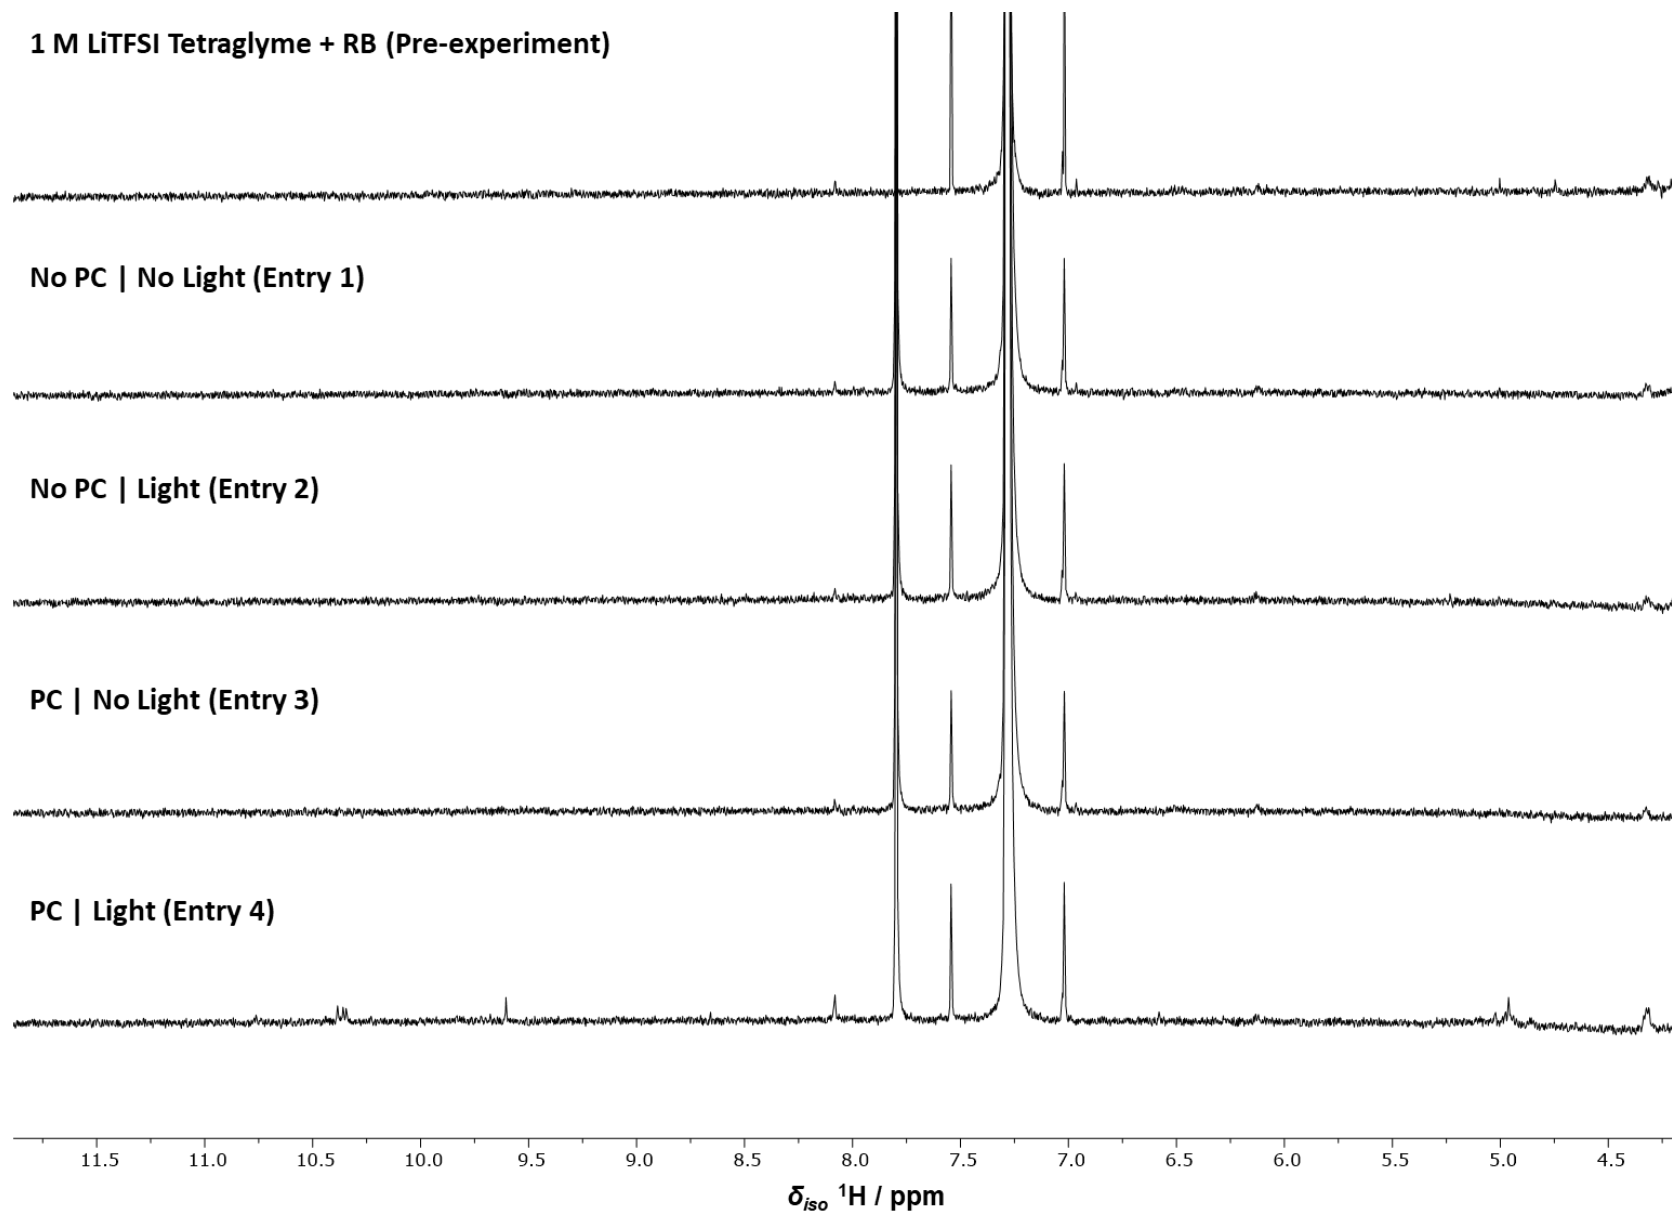

**Figure S6.** The highlighted baseline of <sup>1</sup>H NMR (400 MHz, CDCl<sub>3</sub>, 298 K) spectra of 1 M LiTFSI tetraglyme experiments from **Table S2**, notable degradation products detected only under singlet oxygen forming reaction conditions (*entry 4*). PC = photocatalyst

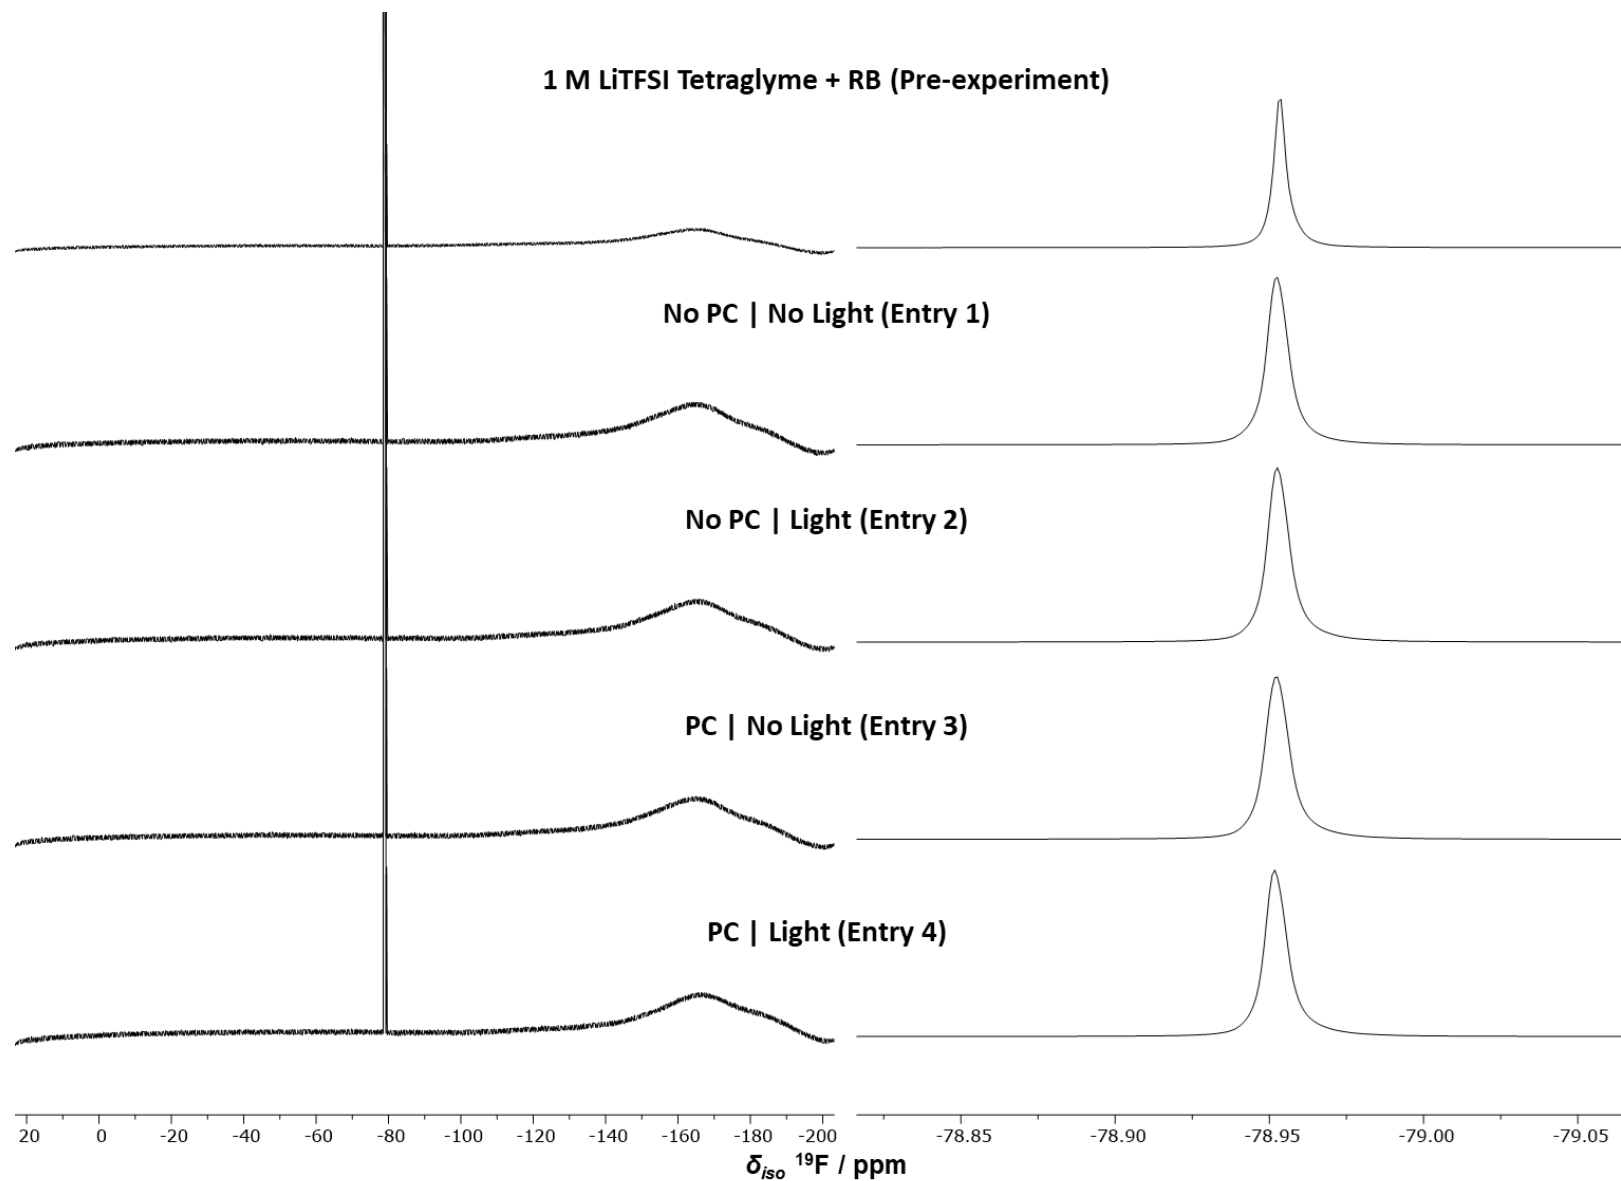

**Figure S7.**  $^{19}\text{F}$  NMR (377 MHz,  $\text{CDCl}_3$ , 298 K) spectra of 1 M LiTFSI tetraglyme experiments from **Table S2** indicating complete stability of LiTFSI to  $^1\text{O}_2$  under photochemical conditions. *Left*) Full spectra window shown, the broad resonance at  $\sim 170$  ppm is the PTFE probe background. *Right*) Highlight of LiTFSI singlet region indicating no change in multiplicity.

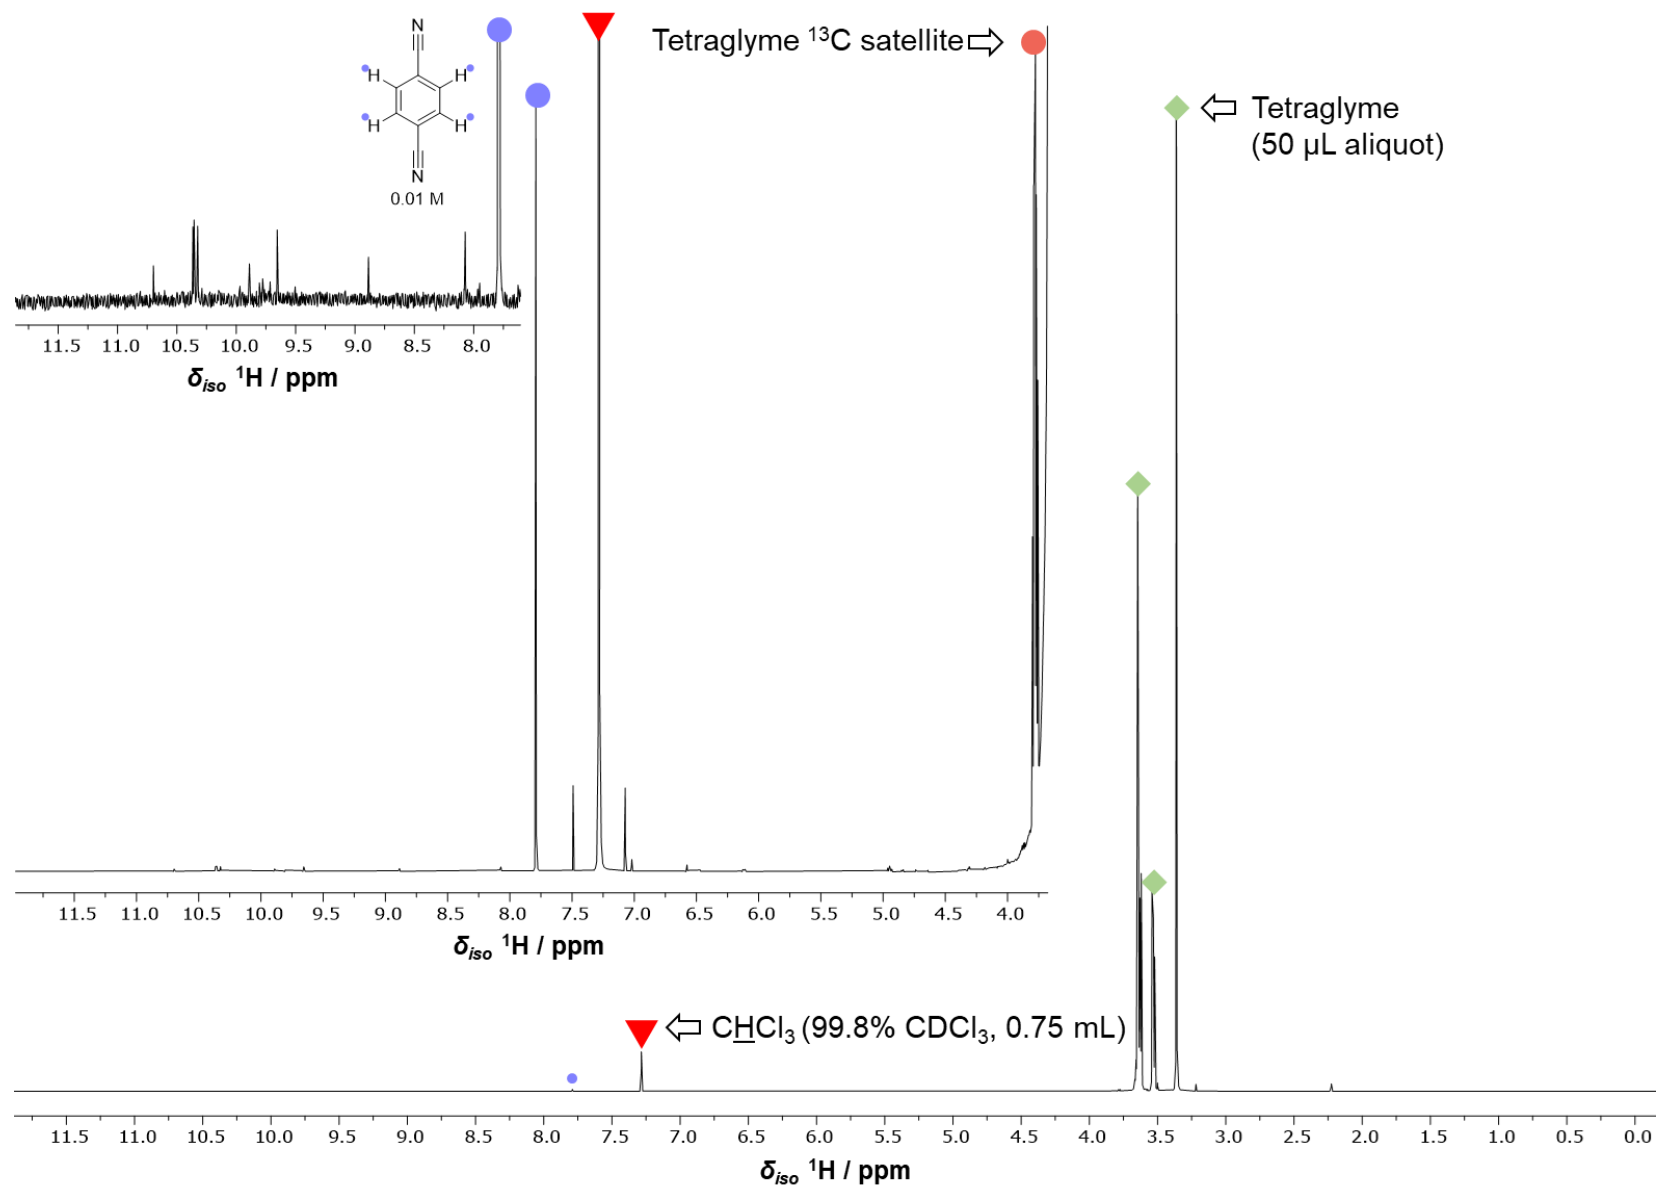

**Figure S8.**  $^1\text{H}$  NMR (500 MHz,  $\text{CDCl}_3$ , 298 K) spectroscopy highlighting degraded tetraglyme attributed to singlet oxygen (Table S1, entry 4). Internal standards in the tetraglyme solution (0.01 M) and tetraglyme  $^{13}\text{C}$  carbon satellites are shown to indicate the trace quantities of degradation products.

## References

- (1) Fulmer, G. R.; Miller, A. J. M.; Sherden, N. H.; Gottlieb, H. E.; Nudelman, A.; Stoltz, B. M.; Bercaw, J. E.; Goldberg, K. I. NMR Chemical Shifts of Trace Impurities: Common Laboratory Solvents, Organics, and Gases in Deuterated Solvents Relevant to the Organometallic Chemist. *Organometallics* **2010**, *29* (9), 2176–2179. <https://doi.org/10.1021/om100106e>.
- (2) Harris, R. K.; Becker, E. D.; Menezes, S. M. C. de; Granger, P.; Hoffman, R. E.; Zilm, K. W. Further Conventions for NMR Shielding and Chemical Shifts (IUPAC Recommendations 2008). *Pure Appl. Chem.* **2008**, *80* (1), 59–84. <https://doi.org/10.1351/pac200880010059>.
- (3) Boneva, M.; Ivanov, S. K.; Oliveros, E.; Braun, A. M. Singlet Oxygen Quenching by Tertiary Alkyl Ethers. *J. Photochem. Photobiol. Chem.* **1992**, *68* (3), 343–351. [https://doi.org/10.1016/1010-6030\(92\)85243-N](https://doi.org/10.1016/1010-6030(92)85243-N).
- (4) Schweitzer, C.; Schmidt, R. Physical Mechanisms of Generation and Deactivation of Singlet Oxygen. *Chem. Rev.* **2003**, *103* (5), 1685–1758. <https://doi.org/10.1021/cr010371d>.
- (5) Ottakam Thotiyil, M. M.; Freunberger, S. A.; Peng, Z.; Bruce, P. G. The Carbon Electrode in Nonaqueous Li–O<sub>2</sub> Cells. *J. Am. Chem. Soc.* **2013**, *135* (1), 494–500. <https://doi.org/10.1021/ja310258x>.
- (6) Fenton, H. J. H. LXXIII.—Oxidation of Tartaric Acid in Presence of Iron. *J. Chem. Soc. Trans.* **1894**, *65* (0), 899–910. <https://doi.org/10.1039/CT8946500899>.
- (7) Kwabi, D. G.; Batcho, T. P.; Amanchukwu, C. V.; Ortiz-Vitoriano, N.; Hammond, P.; Thompson, C. V.; Shao-Horn, Y. Chemical Instability of Dimethyl Sulfoxide in Lithium–Air Batteries. *J. Phys. Chem. Lett.* **2014**, *5* (16), 2850–2856. <https://doi.org/10.1021/jz5013824>.
- (8) Mourad, E.; Petit, Y. K.; Spezia, R.; Samojlov, A.; Summa, F. F.; Prehal, C.; Leybold, C.; Mahne, N.; Slugovc, C.; Fontaine, O.; Brutti, S.; Freunberger, S. A. Singlet Oxygen from Cation Driven Superoxide Disproportionation and Consequences for Aprotic Metal–O<sub>2</sub> Batteries. *Energy Environ. Sci.* **2019**, *12* (8), 2559–2568. <https://doi.org/10.1039/C9EE01453E>.
- (9) Lepage, D.; Michot, C.; Liang, G.; Gauthier, M.; Schougaard, S. B. A Soft Chemistry Approach to Coating of LiFePO<sub>4</sub> with a Conducting Polymer. *Angew. Chem. Int. Ed.* **2011**, *50* (30), 6884–6887. <https://doi.org/10.1002/anie.201101661>.
- (10) Mason, D. Those Pesky Peroxides.... *J. Chem. Health Saf.* **2014**, *21* (3), 13–15. <https://doi.org/10.1016/j.jchas.2013.12.011>.
- (11) Sagadevan, A.; Hwang, K. C.; Su, M.-D. Singlet Oxygen-Mediated Selective C–H Bond Hydroperoxidation of Etheral Hydrocarbons. *Nat. Commun.* **2017**, *8* (1), 1812. <https://doi.org/10.1038/s41467-017-01906-5>.
